# Supplementary material for: Seasonal foraging behavior of Weddell seals relation to oceanographic environmental conditions in the Ross Sea, Antarctica
Source: Copernicus journal article supplement (doi:10.5194/egusphere-2023-2757), 2024-01-03
Supplement: Supplementary file 1 [file egusphere-2023-2757-supplement.pdf]

Supplementary Materials

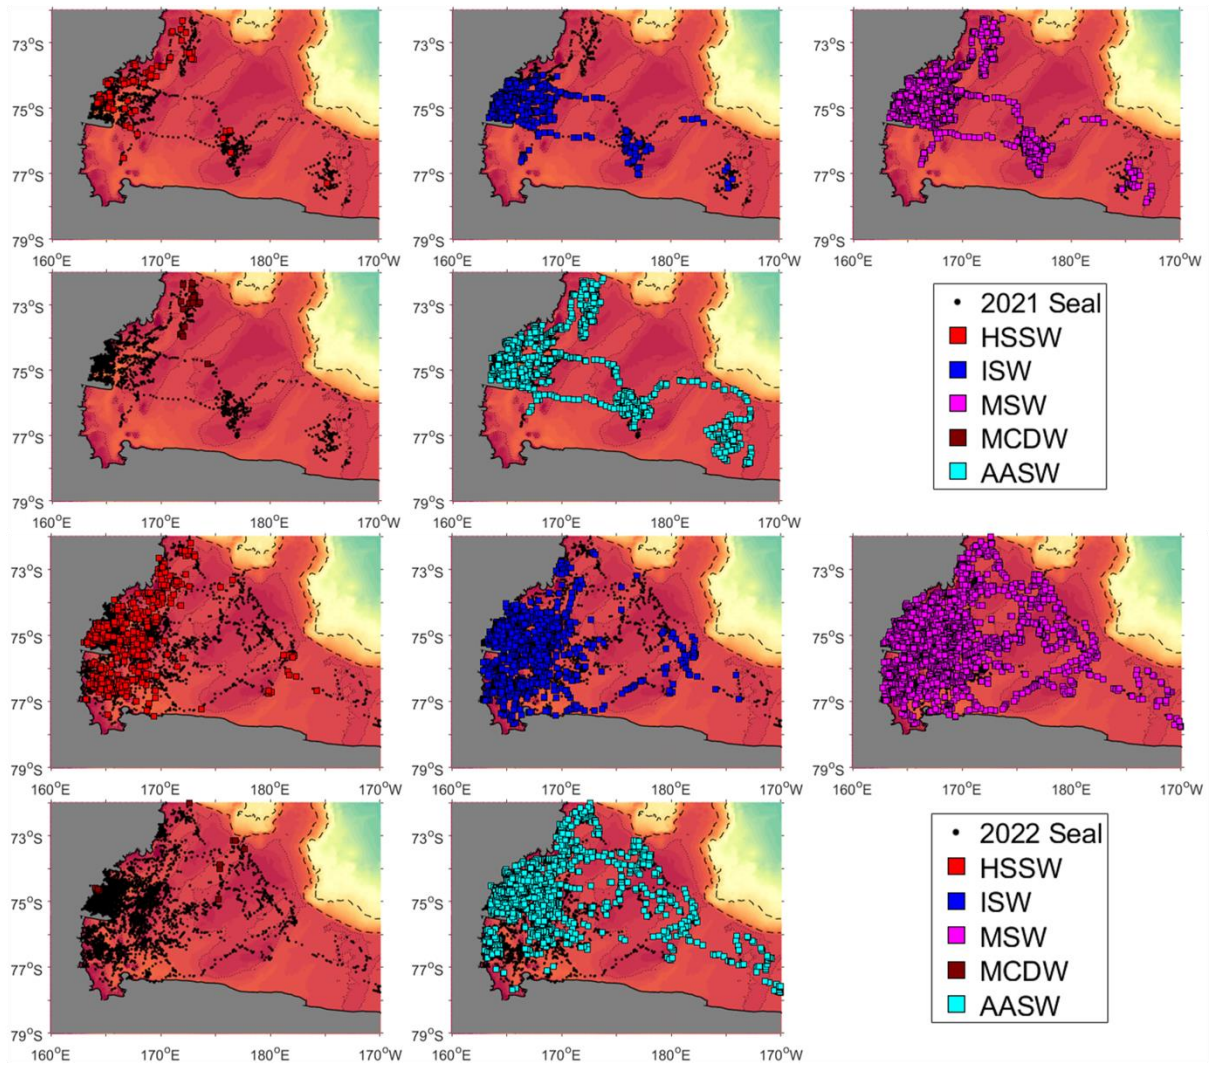

**Supplementary Figure 1** The oceanographic information obtained from the Seal-attached CTDs is spatially represented for the years 2021 and 2022. The information for 2021 is displayed above, while the data for 2022 is shown below. Each color represents a different water mass.

5

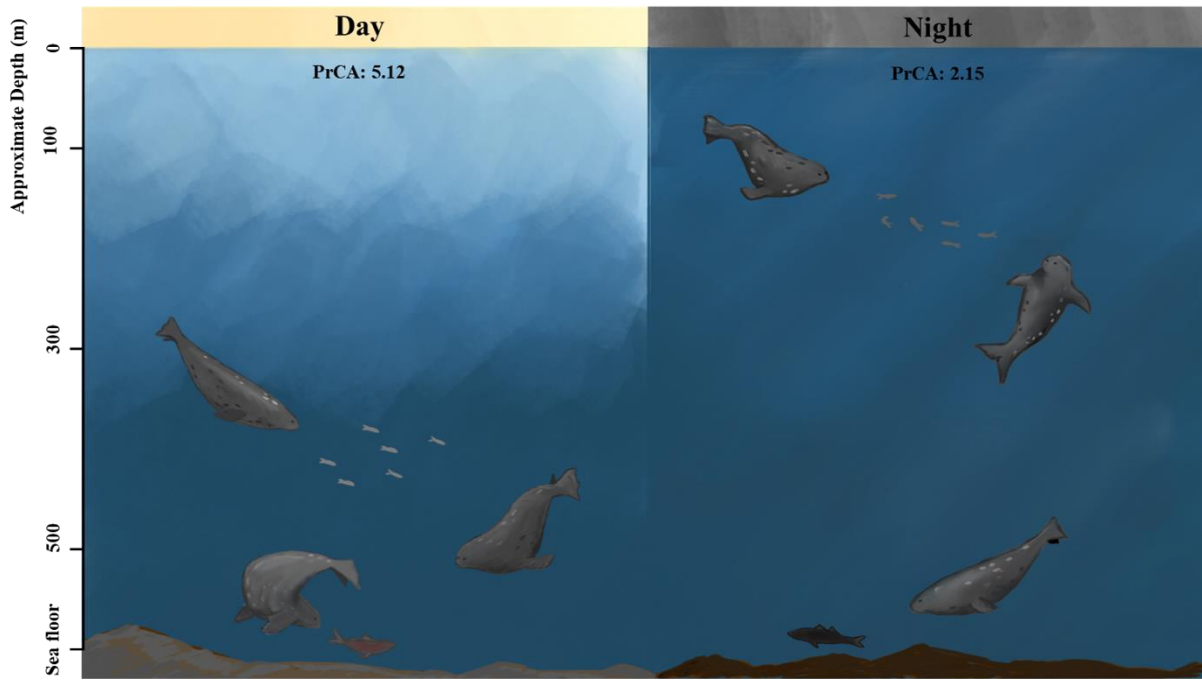

**Supplementary Figure 2.** Schematic summary of diel changes in diving behaviors. During the day, pelagic preys move to deeper waters, consequently leading to an increase in the diving depth of Weddell seals, with a higher proportion of benthic dives observed.

10

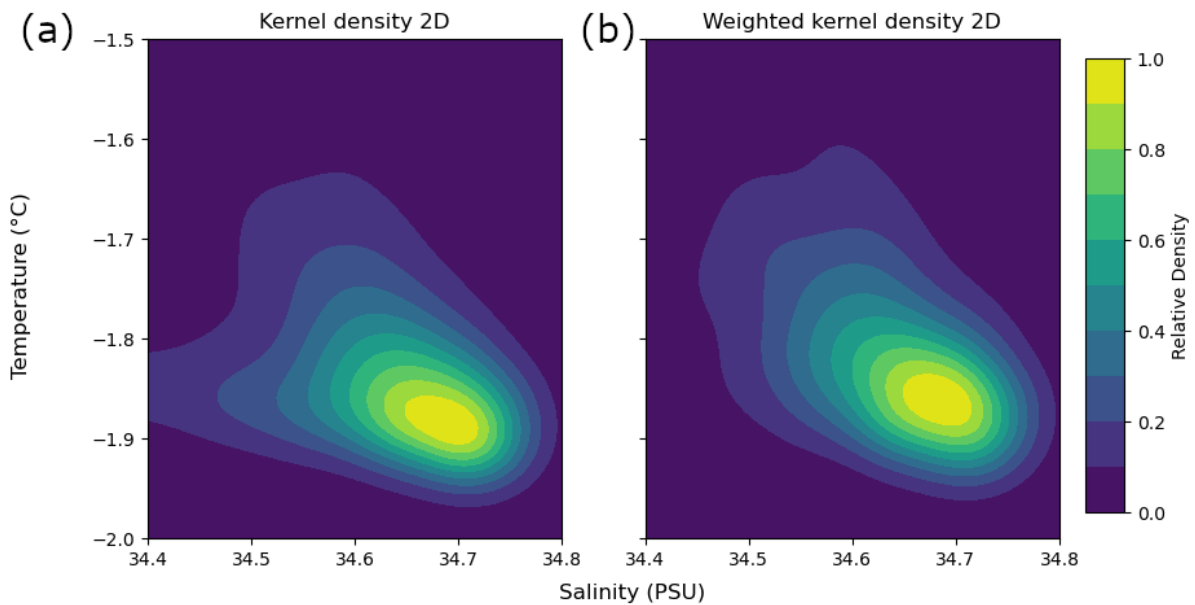

**Supplementary Figure 3 Kernel Density Plots of Dive Behavior in TS Diagram.** (a) The kernel density plot of water temperature and salinity for each dive, illustrating the distribution of dive in the TS diagram. (b) The weighted kernel density plot, where the density is weighted by the number of PrCA (Prey Capture Attempts) events for each dive. Both plots are based on data collected from seal-attached CTD sensors, which provide temperature, salinity, and PrCA data for each dive. The density was highest around a salinity of 34.7 PSU and a temperature of -1.85 °C for both sides.

15

**Supplementary Table 1. Metadata for captured Weddell seals**

| <b>Identification</b> | <b>Age</b> | <b>Sex</b> | <b>Body Length</b> | <b>Capture Date</b> | <b>Logger Type</b> | <b>Tagged Part</b> |
|-----------------------|------------|------------|--------------------|---------------------|--------------------|--------------------|
| 329                   | Adult      | F          | 2.60               | 2021-02-16          | CTD-SRDL           | back               |
| 330                   | Adult      | M          |                    | 2021-02-16          | CTD-SRDL           | back               |
| 333                   | Adult      | F          | 2.00               | 2021-02-18          | CTD-SRDL           | head               |
| 334                   | Adult      | M          | 2.20               | 2021-02-19          | CTD-SRDL           | head               |
| 335                   | Adult      | M          | 2.00               | 2021-02-19          | CTD-SRDL           | head               |
| 344                   | Adult      | M          | 2.50               | 2021-02-19          | CTD-SRDL           | head               |
| 337                   | Adult      | F          | 2.50               | 2021-02-20          | CTD-SRDL           | head               |
| 343                   | Adult      | M          | 2.40               | 2021-02-20          | CTD-SRDL           | head               |
| 345                   | Adult      | F          | 2.10               | 2021-02-21          | CTD-SRDL           | head               |
| 346                   | Adult      | F          | 2.30               | 2021-02-22          | CTD-SRDL           | head               |
| 347                   | Adult      | M          | 2.30               | 2021-02-23          | CTD-SRDL           | head               |
| 348                   | Adult      | M          | 1.90               | 2021-02-23          | CTD-SRDL           | head               |
| 349                   | Adult      | M          | 2.30               | 2021-02-24          | CTD-SRDL           | head               |
| 350                   | Adult      | F          | 2.20               | 2021-02-24          | CTD-SRDL           | head               |
| 351                   | Adult      | F          | 2.50               | 2021-02-25          | CTD-SRDL           | head               |
| 352                   | Adult      | M          | 2.40               | 2021-02-25          | CTD-SRDL           | head               |
| 353                   | Adult      | F          | 2.40               | 2021-02-26          | CTD-SRDL           | head               |
| 354                   | Adult      | F          | 2.50               | 2021-02-27          | CTD-SRDL           | head               |
| 369                   | Adult      | F          | 2.20               | 2021-02-27          | CTD-SRDL           | head               |
| G5                    | Adult      | M          | 2.60               | 2021-03-04          | CTD-SRDL with GPS  | back               |
| G2                    | Adult      | F          | 2.50               | 2021-03-04          | CTD-SRDL with GPS  | back               |
| G3                    | Adult      | F          | 2.40               | 2021-03-04          | CTD-SRDL with GPS  | back               |
| G4                    | Adult      | F          | 2.40               | 2021-03-07          | CTD-SRDL with GPS  | back               |
| G1                    | Adult      | M          | 2.40               | 2021-03-07          | CTD-SRDL with GPS  | back               |
| 553                   | Adult      | M          | 1.80               | 2022-02-15          | CTD-SRDL           | head               |
| 551                   | Adult      | F          | 1.85               | 2022-02-16          | CTD-SRDL           | head               |
| 552                   | Adult      | M          | 1.85               | 2022-02-17          | CTD-SRDL           | head               |
| G605                  | Adult      | M          | 1.90               | 2022-02-18          | CTD-SRDL with GPS  | back               |
| 547                   | Adult      | M          | 1.90               | 2022-02-22          | CTD-SRDL           | head               |
| 387                   | Adult      | M          | 2.20               | 2022-02-23          | CTD-SRDL           | head               |
| 549                   | Adult      | F          | 2.00               | 2022-02-23          | CTD-SRDL           | head               |
| 581                   | Adult      | M          | 2.30               | 2022-02-24          | CTD-SRDL           | head               |
| G606                  | Adult      | M          | 1.70               | 2022-02-24          | CTD-SRDL with GPS  | back               |

|     |       |   |      |            |          |      |
|-----|-------|---|------|------------|----------|------|
| 580 | Adult | M | 2.05 | 2022-02-28 | CTD-SRDL | head |
| 582 | Adult | F | 1.80 | 2022-02-28 | CTD-SRDL | head |
| 430 | Adult | M | 2.20 | 2022-03-01 | CTD-SRDL | head |
| 426 | Adult | M | 2.15 | 2022-03-04 | CTD-SRDL | head |
| 427 | Adult | F | 2.20 | 2022-03-04 | CTD-SRDL | head |
| 583 | Adult | M | 2.00 | 2022-03-04 | CTD-SRDL | head |
| 548 | Adult | F | 2.00 | 2022-03-05 | CTD-SRDL | head |
| 584 | Adult | F | 2.15 | 2022-03-06 | CTD-SRDL | head |
| 386 | Adult | M | 2.15 | 2022-03-06 | CTD-SRDL | head |

25 **Supplementary Table 2. Comparison of models predicting prey capture attempts using the Akaike Information Criterion (AIC) and Bayesian Information Criterion (BIC) values**

| AIC      | BIC      | Explanatory Variable (Fixed effects) |
|----------|----------|--------------------------------------|
| 106134.9 | 106240.5 | WM_f+Benthic+D_Month_f               |
| 106138.1 | 106252.5 | WM_f+Benthic+D_Month_f+C_Year        |
| 106138.2 | 106252.5 | WM_f+Benthic+Sex+D_Month_f           |
| 106141.8 | 106264.9 | WM_f+Benthic+Sex+D_Month_f+C_Year    |
| 106301.3 | 106371.7 | WM_f+Benthic                         |
| 106305.1 | 106384.2 | WM_f+Benthic+Sex                     |
| 106305.1 | 106384.3 | WM_f+Benthic+C_Year                  |
| 106309.1 | 106397.1 | WM_f+Benthic+Sex+C_Year              |
| 106481.9 | 106561.1 | Benthic+D_Month_f                    |
| 106483.3 | 106571.2 | Benthic+D_Month_f+C_Year             |
| 106484.8 | 106572.7 | Benthic+Sex+D_Month_f                |
| 106486.6 | 106583.4 | Benthic+Sex+D_Month_f+C_Year         |
| 106583   | 106679.7 | WM_f+D_Month_f                       |
| 106585.6 | 106691.2 | WM_f+Sex+D_Month_f                   |
| 106586.1 | 106691.7 | WM_f+D_Month_f+C_Year                |

|          |          |                           |
|----------|----------|---------------------------|
| 106589.2 | 106703.5 | WM_f+Sex+D_Month_f+C_Year |
| 106598.9 | 106642.9 | Benthic                   |
| 106600.7 | 106653.4 | Benthic+C_Year            |
| 106602.1 | 106654.8 | Benthic+Sex               |
| 106604.3 | 106665.9 | Benthic+Sex+C_Year        |
| 106768.8 | 106830.4 | WM_f                      |
| 106772.2 | 106842.6 | WM_f+Sex                  |
| 106772.8 | 106843.2 | WM_f+C_Year               |
| 106776.4 | 106855.6 | WM_f+Sex+C_Year           |
| 107074.9 | 107145.2 | D_Month_f                 |
| 107076.1 | 107155.2 | D_Month_f+C_Year          |
| 107076.9 | 107156.1 | Sex+D_Month_f             |
| 107078.7 | 107166.6 | Sex+D_Month_f+C_Year      |
| 107182.8 | 107226.8 | C_Year                    |
| 107183.5 | 107227.5 | Sex                       |
| 107185.8 | 107238.6 | Sex+C_Year                |

**Supplementary Table 3. Comparison of models predicting diving depth using AIC (Akaike Information Criterion) and BIC (Bayesian Information Criterion) values**

| AIC      | BIC      | Explanatory Variable (Fixed effects) |
|----------|----------|--------------------------------------|
| 584234.3 | 584322.3 | Sex+D_Month_f+C_Year                 |
| 584239.5 | 584318.7 | Sex+D_Month_f                        |
| 584241   | 584320.2 | D_Month_f+C_Year                     |
| 584246.3 | 584316.7 | D_Month_f                            |
| 584333.3 | 584386.1 | Sex+C_Year                           |
| 584338.6 | 584382.6 | Sex                                  |
| 584340.2 | 584384.2 | C_Year                               |
